# Supplementary material
Source: PubMed Central journal article supplement (PMC2446649)
Supplement: supp_7_6_1053__1.pdf [file supp_7_6_1053__1.pdf]

## Supplementary Data - Table S1

**Table S1 – Primers used in this study**

| Primer Name        | Sequence (5' – 3')          | Annealing / Extension | Purpose                                                                                                                                        |
|--------------------|-----------------------------|-----------------------|------------------------------------------------------------------------------------------------------------------------------------------------|
| RHAFw              | CCTTGTTCTCGGTGGCTATTT       |                       | <i>RHA</i> forward common primer                                                                                                               |
| RHA1Rev            | GGCGGATGGATTGGTTGAGC        | 55°C / 90 s           | <i>RHA1</i> , <i>RHA2</i> , <i>RHA3</i> reverse specific primers                                                                               |
| RHA2Rev            | CTTGGCCCCCCTATGTCTG         |                       |                                                                                                                                                |
| RHA3Rev            | CTCCGCTGTCGTGTA CTGATG      |                       |                                                                                                                                                |
| RHA2Up             | GCAGACGAACAAACGATCATGGAACA  | 65°C / 3 min          | Amplify the upstream region of the <i>RHA2</i> gene (PCR with Genome-walker libraries of strain PYCC 4416, <i>MAT A1</i> )                     |
| AP1 <sup>a</sup>   | GTAATACGACTCACTATAGGGC      |                       |                                                                                                                                                |
| RHA2Up2            | AAGGGCAGACGACAAGAACAAGGCC   | 65°C / 3 min          | Amplify the upstream region of the <i>RHA2</i> gene (nested PCR).<br><b>[fragment 1 in Fig. 1]</b>                                             |
| AP2 <sup>a</sup>   | ACTATAGGGCACGCGTGGT         |                       |                                                                                                                                                |
| RHA3Up2            | GAGAACCACGGACTGTGAGGTCGAG   | 63°C / 3 min          | Amplify the region between the <i>RHA2</i> and <i>RHA3</i> genes.<br><b>[fragment 2 in Fig. 1]</b>                                             |
| SCP2Up             | GGCTGCGGAAGACAACGACTG       |                       |                                                                                                                                                |
| STE20CRFw          | ACAGACATCATCGACAGCAAC       | 55°C / 1 min          | Amplify the conserved regions of the <i>RtSTE20</i> alleles ( <i>MAT A1</i> and <i>MAT A2</i> strains)<br><b>[fragments 3 and 4 in Fig. 1]</b> |
| STE20CRRRev        | CGTACTCCTTCTGCTTGACGA       |                       |                                                                                                                                                |
| NCARFw             | CGRGAAGACCTGAARCCGTT        | 59°C / 90 s           |                                                                                                                                                |
| NCARRev            | CATGWACTCCATGACGACCCA       |                       |                                                                                                                                                |
| STE20DwA2          | CGAGTGCTGACAGTCGCATCTTTCCG  | 67°C / 3 min          | Amplify the downstream region of the <i>RHA2.A2</i> gene (PCR with Genome-walking libraries of strain PYCC 4661, <i>MAT A2</i> )               |
| (AP1) <sup>a</sup> |                             |                       |                                                                                                                                                |
| STE20Dw2A2         | CGAAGCTGACCGACCAGAAGTCGAAG  | 65°C / 3 min          | Amplify the downstream region of the <i>RHA2.A2</i> gene (nested PCR).<br><b>[fragment 5 in Fig. 1]</b>                                        |
| (AP2) <sup>a</sup> |                             |                       |                                                                                                                                                |
| STE20UpA2          | ACCGCAAGGCGAGGTAGAAGGTTCTGA | 67°C / 3 min          | Amplify the upstream region of the <i>RtSTE20.A2</i> gene (PCR with Genome-walking libraries of strain PYCC 4661, <i>MAT A2</i> ).             |
| (AP1) <sup>a</sup> |                             |                       |                                                                                                                                                |
| STE20Up2A2         | AGGTAGAAGGTTGAGCCGGTGTCTGT  | 65°C / 3 min          | Amplify the upstream region of the <i>RtSTE20.A2</i> gene (nested PCR).<br><b>[fragment 6 in fig. 1]</b>                                       |
| (AP2) <sup>a</sup> |                             |                       |                                                                                                                                                |
| NCAR3Fw            | TGGCATTGGCGAGCMCGMAA        | 55°C / 90 s           | Amplify part of the <i>STE3</i> homologue in <i>R. kratochvilovae</i> (strain PYCC 4818, <i>MAT A1</i> )                                       |
| NCAR4Rev           | GRCRAAGAAGASGAARAAGA        |                       |                                                                                                                                                |
| NCAR5STE3Fw        | CATCTTCTGGTGKTGGTCAMCGT     | 60°C / 1 min          | Amplify part of the of the <i>STE3</i> homologue in <i>R. toruloides</i> (strain PYCC 4416, <i>MAT A1</i> ).                                   |
| NCAR6STE3Rev       | GGGASGSTGTAGGCGATTTG        |                       |                                                                                                                                                |
| (STE20Dw2A2)       |                             | 66°C / 90 s           | Amplify a <i>MAT A1</i> -specific region (3' end of <i>RtSTE20</i> gene to the CDS of <i>RHA2</i> ).                                           |
| MC074              | GGGTCCACGAGATTTCTGGGGTACTTG |                       |                                                                                                                                                |
| (STE20Dw2A2)       |                             | 63°C / 90 s           | Amplify a <i>MAT A2</i> -specific region (3' end of <i>RtSTE20</i> gene to the CDS of <i>RHA2.A2</i> ).                                        |
| MC071              | GGTGCATGCCATGTACGAGGTGACA   |                       |                                                                                                                                                |

<sup>a</sup> primers supplied in the Universal Genome-Walker kit (BD Biosciences Clontech). All the others were obtained from MWG Biotech AG, Germany.

## Supplementary Data – Table S2

### Trace Archive Sequences of *S. salmonicolor* (IAM 12258):

| <b><i>SsSTE20</i> homologue</b>                                       |
|-----------------------------------------------------------------------|
| >gnl ti 1243964000 name:BAUG19266.b1 mate: <a href="#">1243962176</a> |
| >gnl ti 1243931275 name:BAUG14477.g1 mate: <a href="#">1243936267</a> |
| >gnl ti 1244008391 name:BAUG52617.b1 mate: <a href="#">1244005607</a> |
| >gnl ti 1244012976 name:BAUG51538.g1 mate: <a href="#">1244013840</a> |
| >gnl ti 1244008568 name:BAUG52794.b1 mate: <a href="#">1244005784</a> |
| >gnl ti 1243932804 name:BAUG11782.g1 mate: <a href="#">1243930020</a> |
| >gnl ti 1243983780 name:BAUG45862.b1 mate: <a href="#">1243984260</a> |
| >gnl ti 1243949766 name:BAUG28456.b1 mate: <a href="#">1243948710</a> |
| >gnl ti 1244033153 name:BAUG61059.b1 mate: <a href="#">1244033249</a> |
| >gnl ti 1243947537 name:BAUG24979.g1 mate: <a href="#">1243947825</a> |
| <b><i>SsRHA1</i> homologue</b>                                        |
| >gnl ti 1244034102 name:BAUG63928.g1 mate: <a href="#">1244034006</a> |
| >gnl ti 1244025649 name:BAUG59699.b1 mate: <a href="#">1244026609</a> |
| >gnl ti 1244026866 name:BAUG59956.b1 mate: <a href="#">1244025906</a> |
| >gnl ti 1243949840 name:BAUG28530.b1 mate: <a href="#">1243949936</a> |
| <b><i>SsRHA2</i> homologue</b>                                        |
| >gnl ti 1244013519 name:BAUG53905.g1 mate: <a href="#">1244012751</a> |
| >gnl ti 1244014847 name:BAUG53217.b1 mate: <a href="#">1244019455</a> |
| >gnl ti 1243996949 name:BAUG45015.g1 mate: <a href="#">1243996565</a> |
| >gnl ti 1243918143 name:BAUG5948.y1 mate: <a href="#">1243917764</a>  |
| >gnl ti 1244015954 name:BAUG56436.g1 mate: <a href="#">1244017874</a> |
| <b><i>SsRHA3</i> homologue</b>                                        |
| >gnl ti 1244010230 name:BAUG51096.g1 mate: <a href="#">1244010134</a> |
| >gnl ti 1243911835 name:BAUG389.y1 mate: <a href="#">1243911451</a>   |
| >gnl ti 1243919179 name:BAUG3533.b1 mate: <a href="#">1243920619</a>  |
| >gnl ti 1244012751 name:BAUG53905.b1 mate: <a href="#">1244013519</a> |
| >gnl ti 1243952391 name:BAUG19945.b1 mate: <a href="#">1243952487</a> |
| >gnl ti 1243997749 name:BAUG39095.g1 mate: <a href="#">1243994101</a> |

### Supplementary Data – Table S3

#### List of additional genes identified in the neighbourhood of putative *MAT* genes in *Sp. roseus*

---

|   |          |                                                                                       |
|---|----------|---------------------------------------------------------------------------------------|
| 1 | RRM      | RNA binding protein (RRM super family)                                                |
| 2 | Mit-Carr | Putative mitochondrial carrier protein                                                |
| 3 | ABC      | Putative ABC1 protein, mitochondrial precursor/ Ubiquinone biosynthesis protein coq 8 |
| 4 | KAP95    | Putative Karyopherin $\beta$ 1 (importin)                                             |
| 5 | DDOST    | Dolichyl diphosphodigosaccharide protein glycosyltransferase 48 KDa subunit           |
| 6 | RPS19/15 | Ribosomal protein S19/S15                                                             |
| 7 | Rib L18  | Ribosomal L18ae protein                                                               |
| 8 | RNAPOL   | Putative DNA directed RNA polymerase III, 30/40 KDa subunit                           |
| 9 | LONP S16 | Peptidase S16, (Lon protease)                                                         |

---

## Supplementary Data – Table S4

### Sequences used for the construction of the phylogenetic tree

|                                          |                       |                                                          |
|------------------------------------------|-----------------------|----------------------------------------------------------|
| <i>Ustilago maydis</i>                   | Umay_Cla4             | <a href="#">AAT39367</a>                                 |
|                                          | Umay_Smu1p            | <a href="#">Q4P5N0</a>                                   |
| <i>Pleurotus djamor</i>                  | Pdja_Cla4             | <a href="#">AAS46755</a>                                 |
| <i>Cryptococcus neoformans</i>           | Cneo_Ste20 $\alpha$   | <a href="#">XP_570118</a>                                |
|                                          | Cneo_Ste20a           | <a href="#">AAN75615</a>                                 |
| <i>Cr. neoformans</i> var. <i>grubii</i> | Crngru_Ste20 $\alpha$ | <a href="#">AAN75173</a>                                 |
| <i>Cr. gattii</i>                        | Crgat_Ste20a          | <a href="#">AAV28761</a>                                 |
|                                          | Crgat_Ste20 $\alpha$  | <a href="#">AAV28796</a>                                 |
| <i>Pneumocytis carinii</i>               | Pncar_Ste20           | <a href="#">AAG38545</a>                                 |
| <i>Yarrowia lipolytica</i>               | Ylip_Pkin             | <a href="#">XP_502152</a>                                |
| <i>Aspergillus fumigatus</i>             | Afum_Chm1             | <a href="#">XP_754042</a>                                |
| <i>Candida albicans</i>                  | Calb_Cla4             | <a href="#">O14427</a>                                   |
| <i>Magnaporthe grisea</i>                | Mgri_Chm1             | <a href="#">XP_369805</a>                                |
| <i>Saccharomyces cerevisiae</i>          | Scer_Pkin             | <a href="#">CAA57879</a>                                 |
|                                          | Scer_Ste20p           | <a href="#">NP_011856</a>                                |
| <i>Penicillium marneffei</i>             | Pmar_PakA             | <a href="#">Q2VWQ3</a>                                   |
| <i>Schizosaccharomyces pombe</i>         | Scpom_Pak1p           | <a href="#">AAC49125</a>                                 |
| <i>Rhodosporidium toruloides</i>         | RtSte20_A1            | <a href="#">EU386160</a>                                 |
|                                          | RtSte20_A2            | <a href="#">EU386161</a>                                 |
| <i>Sporobolomyces roseus</i>             | Sr_Ste20              | <sup>a</sup> Scaffold 9, contig 11                       |
| <i>Puccinia graminis</i>                 | Pgra_Smu1             | <sup>b</sup> PGTG_14316.2, Supercontig 51: 338996-341873 |

<sup>a</sup> *Sporobolomyces roseus* genome sequencing project database, Joint Genome Institute (JGI):

<http://genome.jgi-psf.org/Sporo1/Sporo1.home.html>

<sup>b</sup> *Puccinia graminis* f. sp. *tritici* genome Database, Broad Institute of MIT and Harvard:

[http://www.broad.mit.edu/annotation/genome/puccinia\\_graminis/Home.html](http://www.broad.mit.edu/annotation/genome/puccinia_graminis/Home.html)

Supplementary Data – Fig. S1

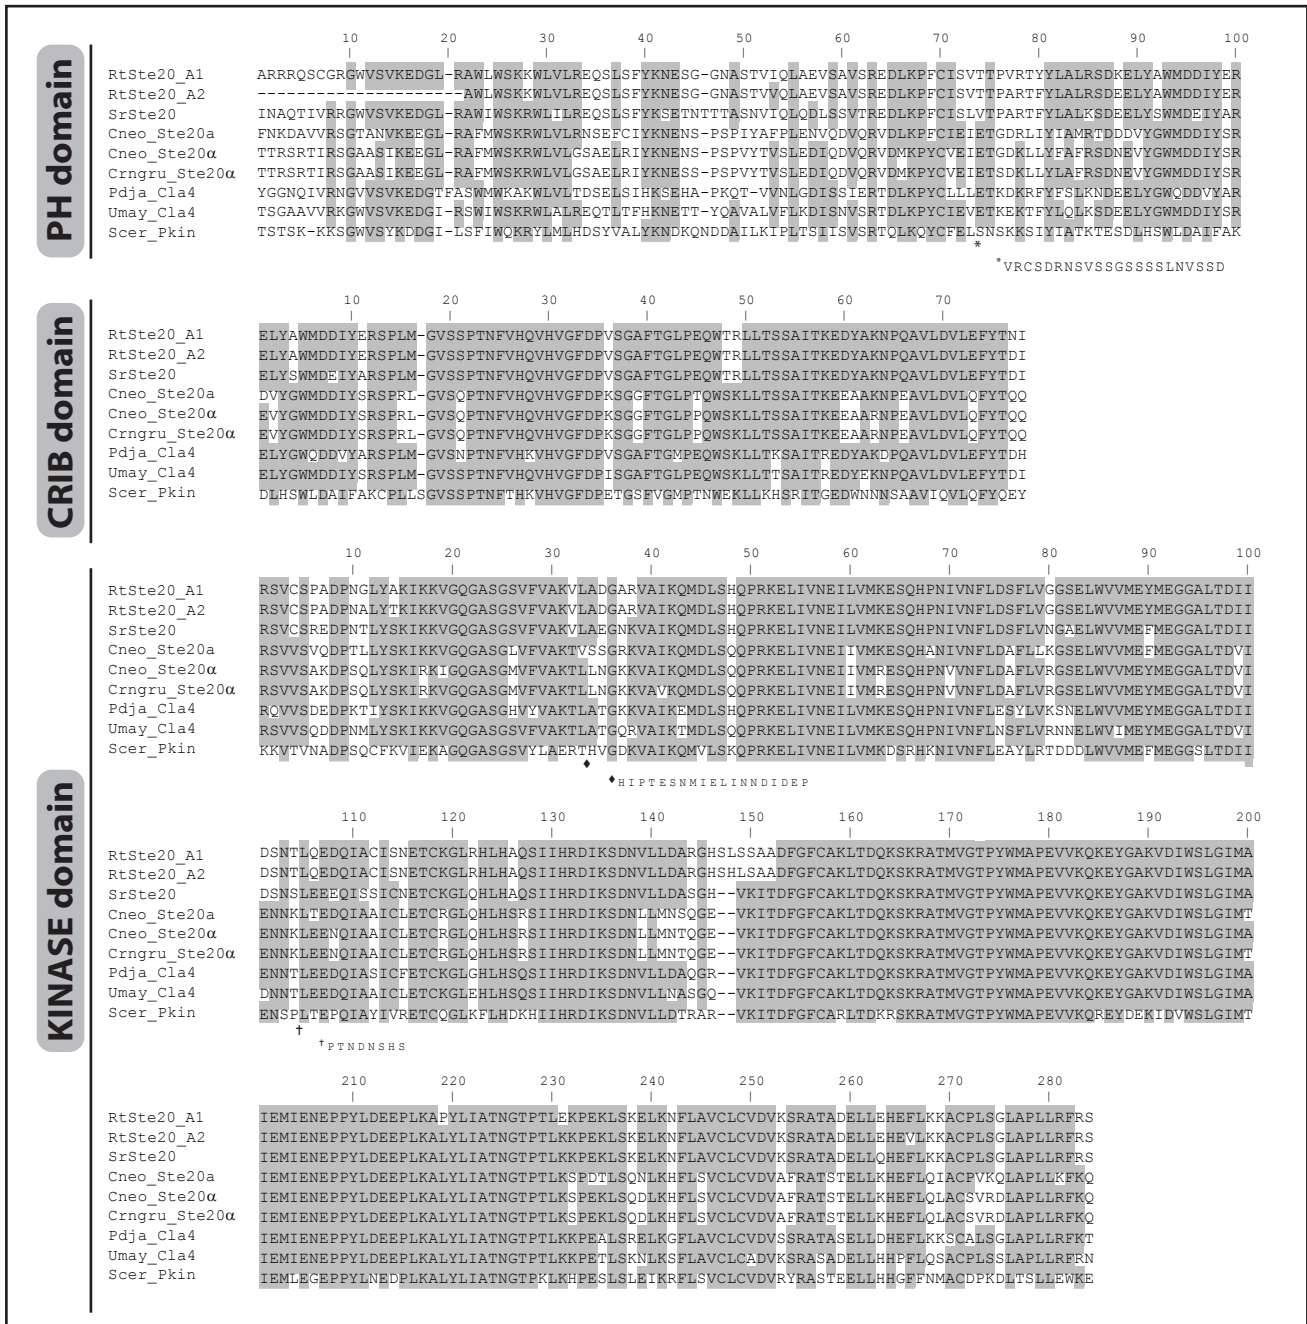

**Fig. S1** – Alignment of the three conserved domains of several fungal PAK kinases: RtSte20\_A1 and RtSte20\_A2 (*Rhodosporidium toruloides*, *MAT A1* and *MAT A2*); SrSte20 (*Sporobolomyces roseus*), Cneo\_Ste20a and Cneo\_Ste20α (*Cryptococcus neoformans*), Cngru\_Ste20α (*C. neoformans* var. *grubii*), Pdja\_Cla4 (*Pleurotus djamor*), Umay\_Cla4 (*Ustilago maydis*) and Scer\_Pkin (*Saccharomyces cerevisiae*). \*, †, ‡ Denotes insertions that occur only in the Scer\_Pkin sequence. Identical amino acids are shaded. The alignment was obtained using the T-Coffee web server.
